# Supplementary material
Source: Springer Nature journal article supplement (https://www.springermedizin.de/resource/supplementary/12888_2014_1669_MOESM1_ESM.pdf/9481148)
Supplement: MOESM1 [file 9481148]

PDQ-4+

(screening DSM-IV  
Axis-II)

SCID-II

(classification  
DSM-IV Axis-II)

MINI-PLUS

(classification  
DSM-IV Axis-I)

Prevalence BD

with BPF & BPD

Patients  
with the  
diagnosis  
BD (incl.  
Subtype I,  
II & NOS)

BPD positive

BPF positive

BD positive

BPF & BPD positive

BPD negative

BPF negative

BD negative
